# Supplementary material
Source: Springer Nature journal article supplement (https://www.springermedizin.de/resource/supplementary/12916_2012_666_MOESM1_ESM.pdf/9598032)

A

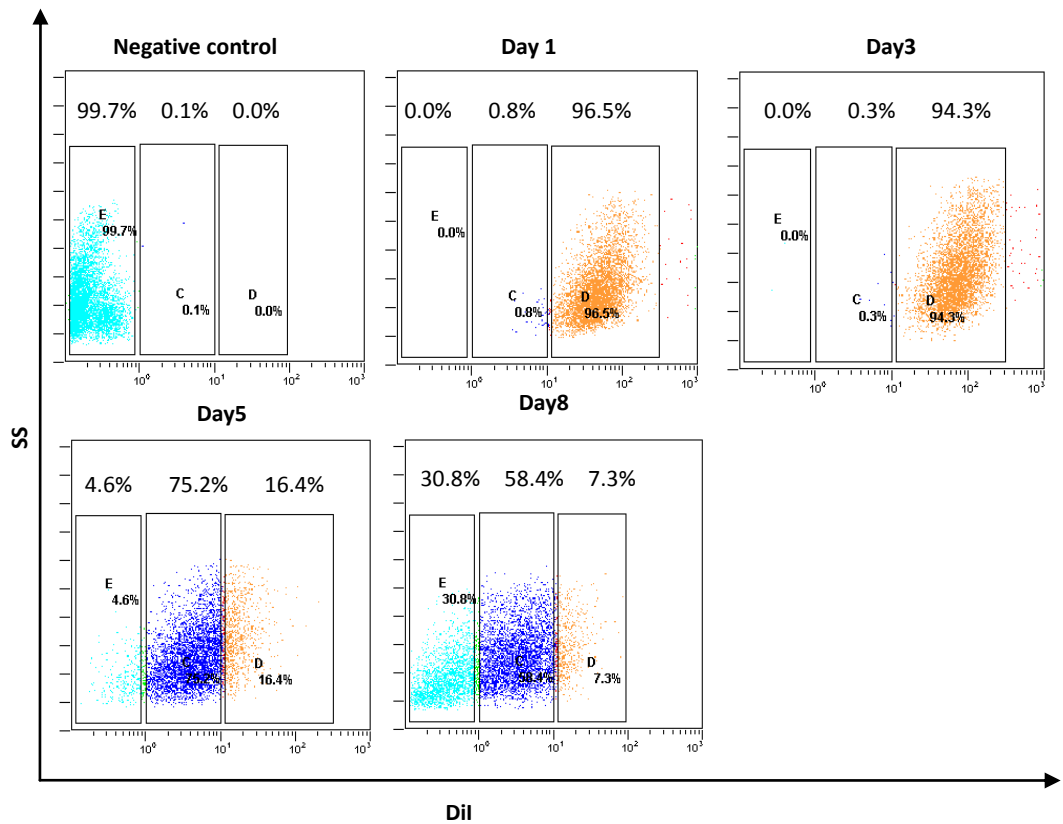

B

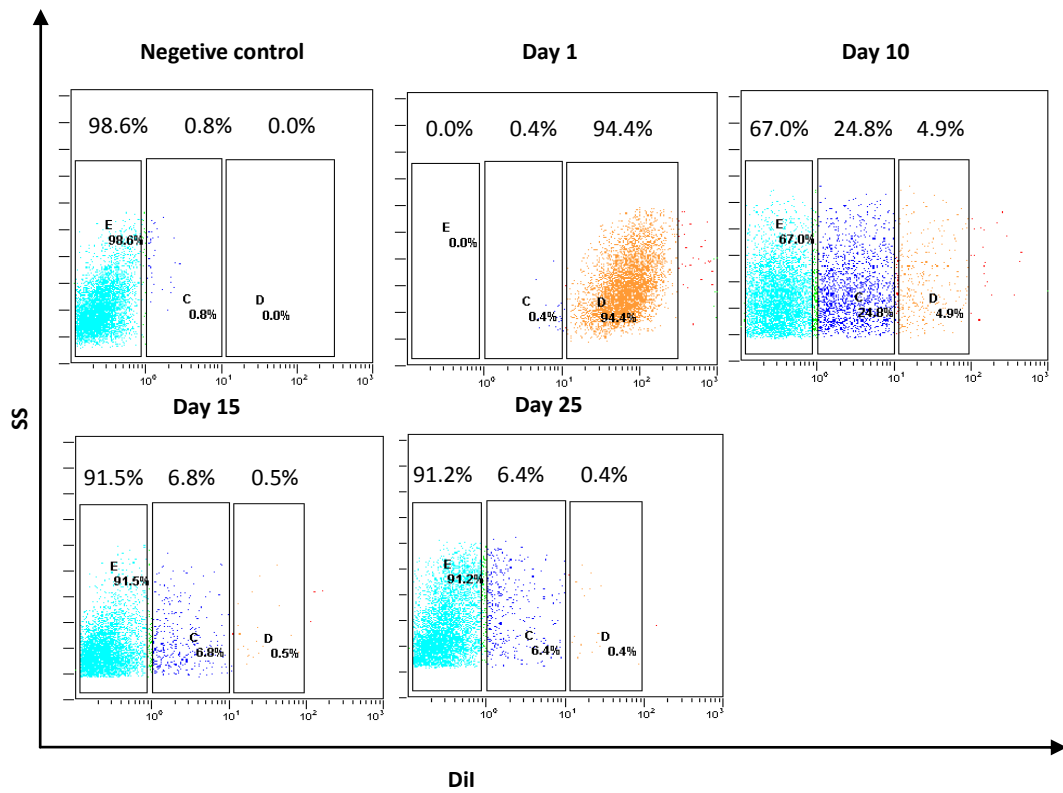

Supplement: MOESM1 [file 9598032]
